# Supplementary material for: Unobstructive Heartbeat Monitoring of Sleeping Infants and Young Children Using Sheet-Type PVDF Sensors
Source: MDPI journal article supplement (doi:10.3390/s23229252), 2023-11-17
Supplement: s1 [file s1]

## Supplementary Materials

# Unobstructive Heartbeat Monitoring of Sleeping Infants and Young Children Using Sheet-Type PVDF Sensors

Daisuke Kumaki<sup>1\*</sup>, Yuko Motoshima<sup>2</sup>, Fujio Higuchi<sup>1</sup>, Katsuhiro Sato<sup>1</sup>, Tomohito Sekine<sup>1,3</sup>, Shizuo Tokito<sup>1,3</sup>

<sup>1</sup> Research Center for Organic Electronics, Yamagata University, 4-3-16, Jonan, Yonezawa, Yamagata, 992-8510, Japan

<sup>2</sup> Faculty of Education, Art and Science, Yamagata University, 1-4-12 Kojirakawa-machi, Yamagata City, Yamagata 990-8560, Japan

<sup>3</sup> Department of Organic Materials Science, Graduate School of Organic Materials Science, Yamagata University, 4-3-16 Jonan, Yonezawa, Yamagata 992-8510, Japan

\* **Corresponding Author:** E-mail: d\_kumaki@yz.yamagata-u.ac.jp

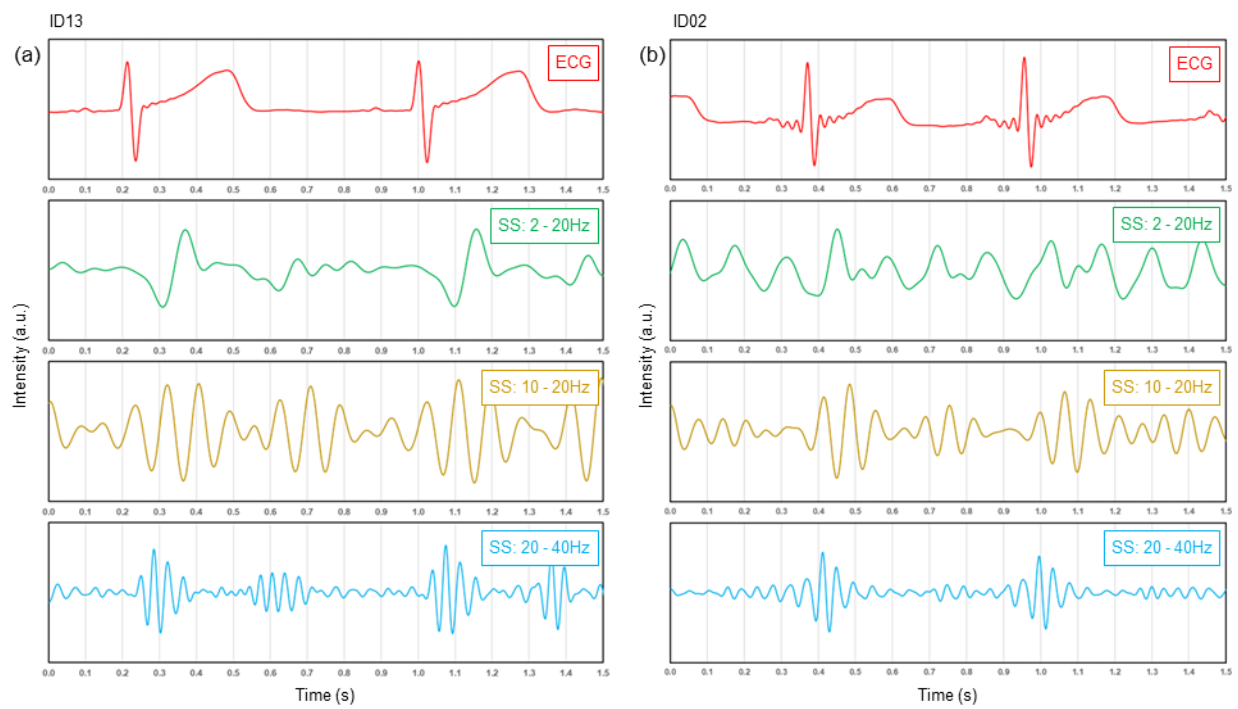

Supplementary Figure S1. Heartbeat waveforms in ECG and sheet sensor for (a) ID13 and (b) ID02.

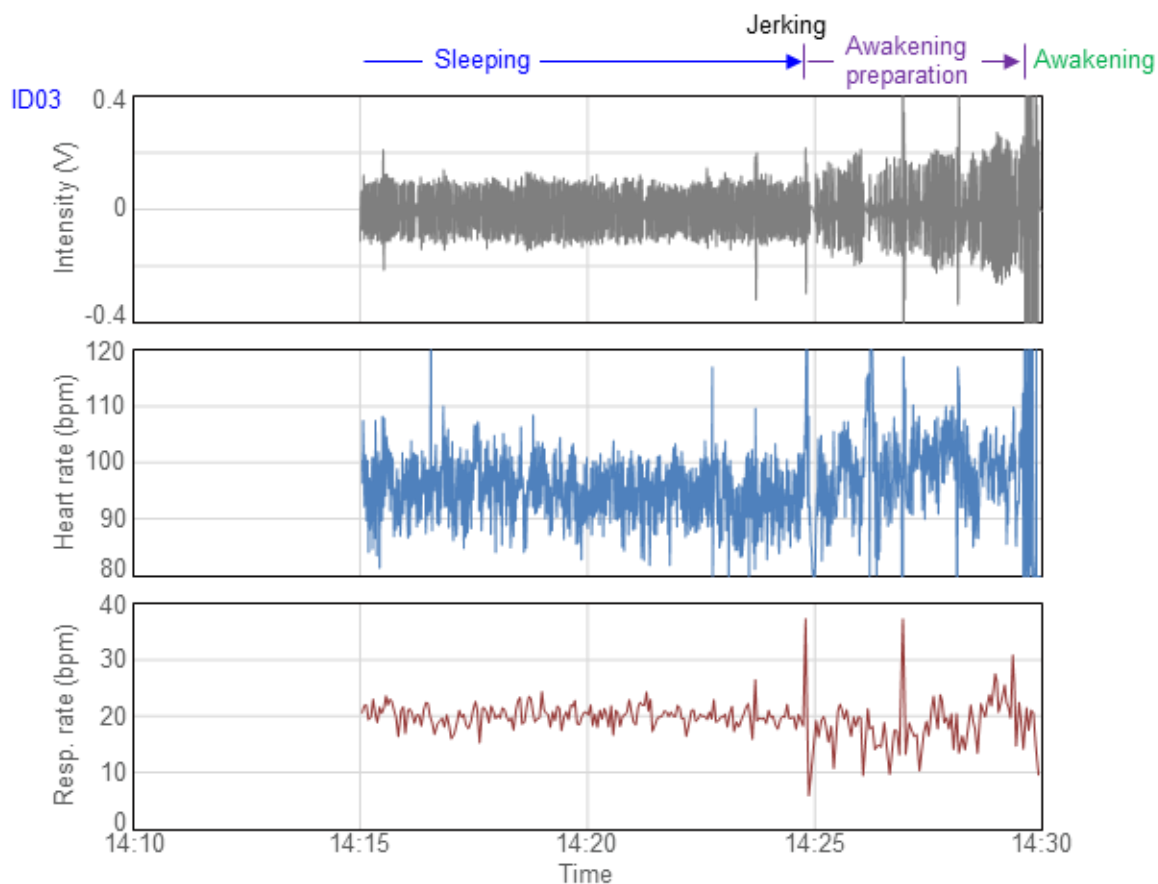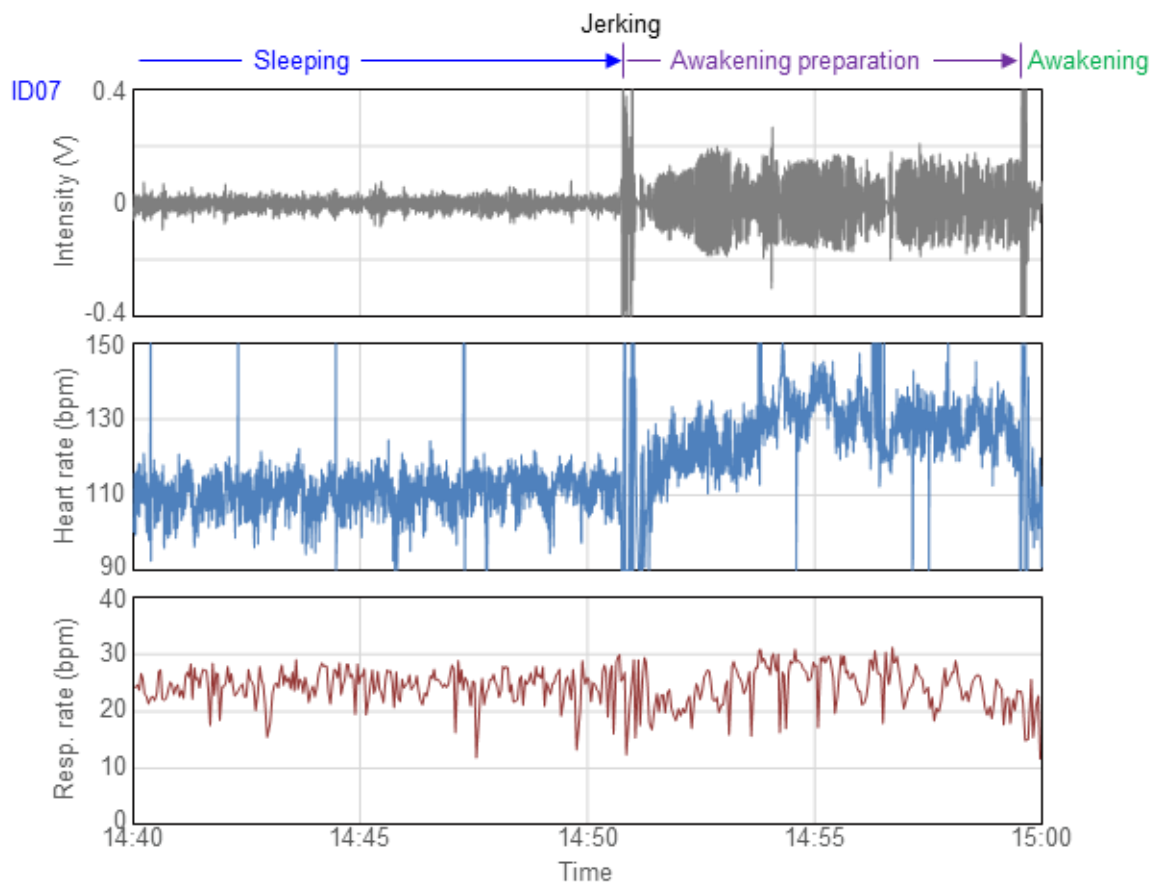

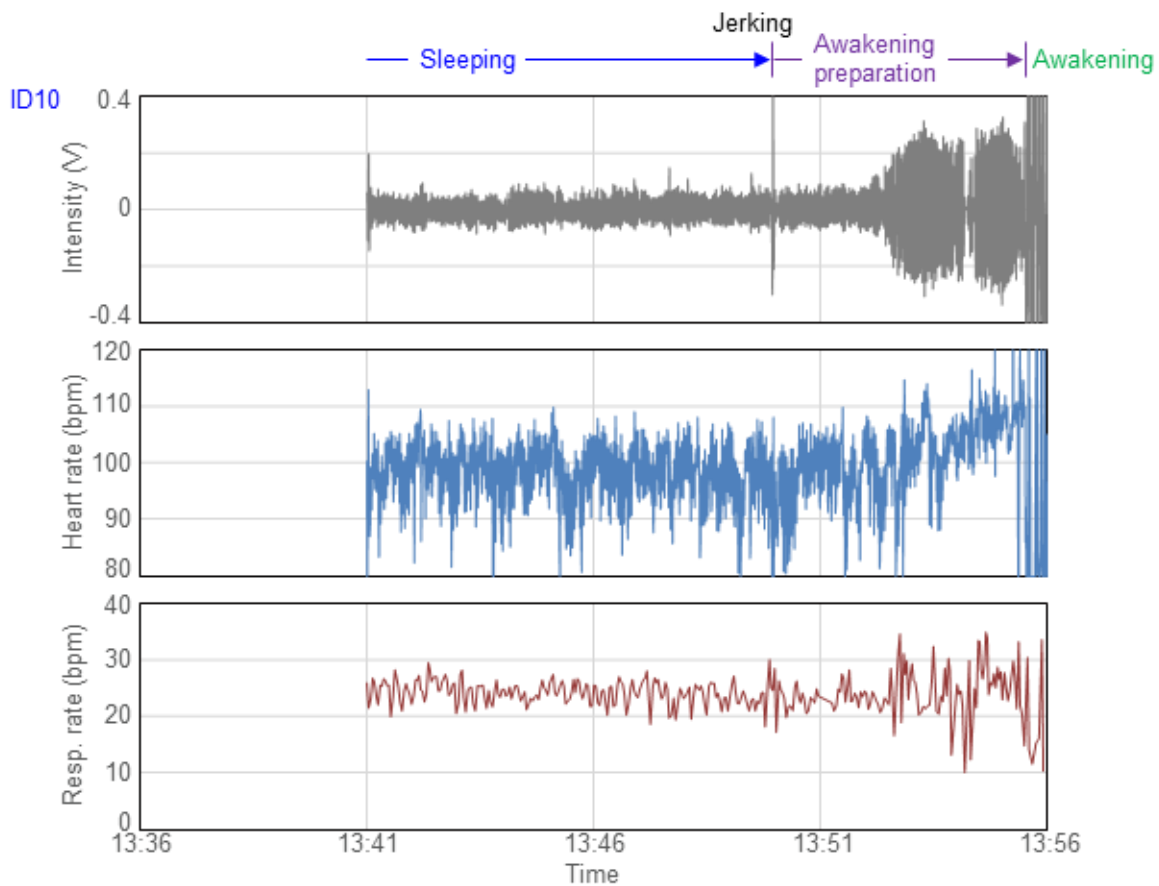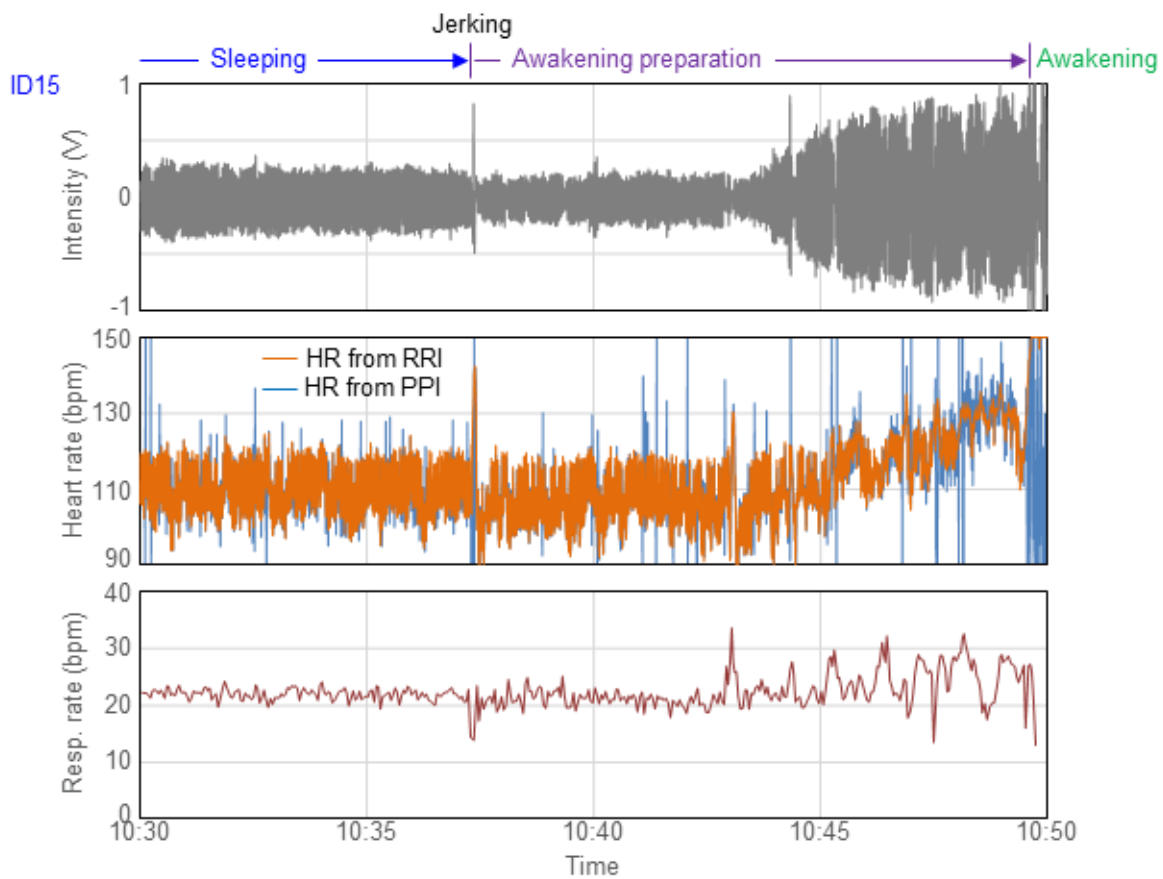

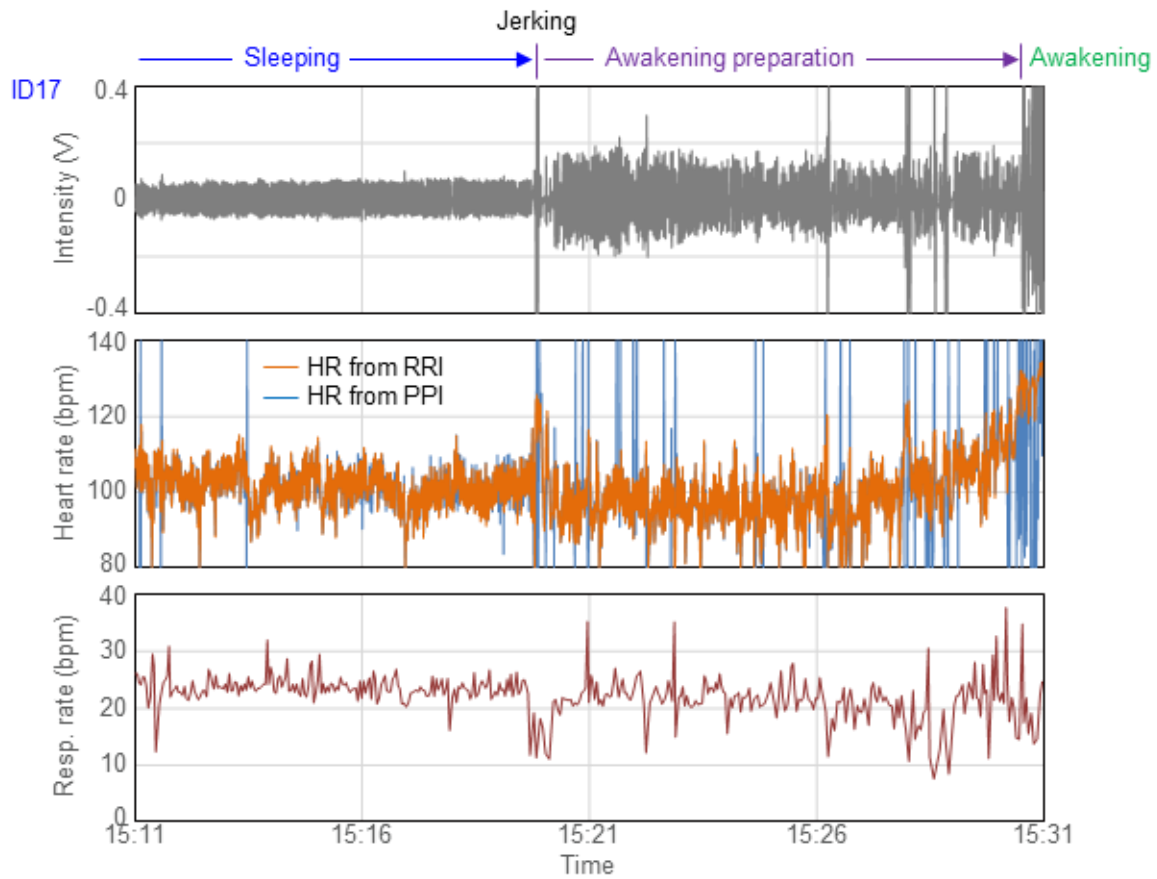

Supplementary Figure S2. Time dependence of respiration waveform, heart rate, and respiratory rate during awakening preparation stage for ID03, ID07, ID10, ID15, and ID17.
